# Supplementary material for: Two-level stochastic search of low-energy conformers for molecular spectroscopy: implementation and validation of MM and QM models
Source: Royal Society of Chemistry journal article supplement (doi:10.1039/c9cp03557e), 2019-01-01
Supplement: c9cp03557e1.pdf [file c9cp03557e1.pdf]

# TWO-LEVEL STOCHASTIC SEARCH OF LOW-ENERGY CONFORMERS FOR MOLECULAR SPECTROSCOPY: IMPLEMENTATION AND VALIDATION OF MM AND QM MODELS.

## Electronic Supplementary Information

Balasubramanian Chandramouli<sup>1,2</sup>, Sara Del Galdo<sup>2</sup>, Marco Fusè<sup>2</sup>, Vincenzo Barone<sup>2,3</sup>, Giordano Mancini<sup>2,3,\*</sup>

<sup>1</sup>Compunet, Istituto Italiano di Tecnologia (IIT), Via Morego 30, I-16163 Genova, Italy

<sup>2</sup>Scuola Normale Superiore di Pisa, Piazza dei Cavalieri 7 I-56126, Pisa, Italy

<sup>3</sup>Istituto Nazionale di Fisica Nucleare (INFN) sezione di Pisa, Largo Bruno Pontecorvo 3,  
**56127 Pisa, Italy**

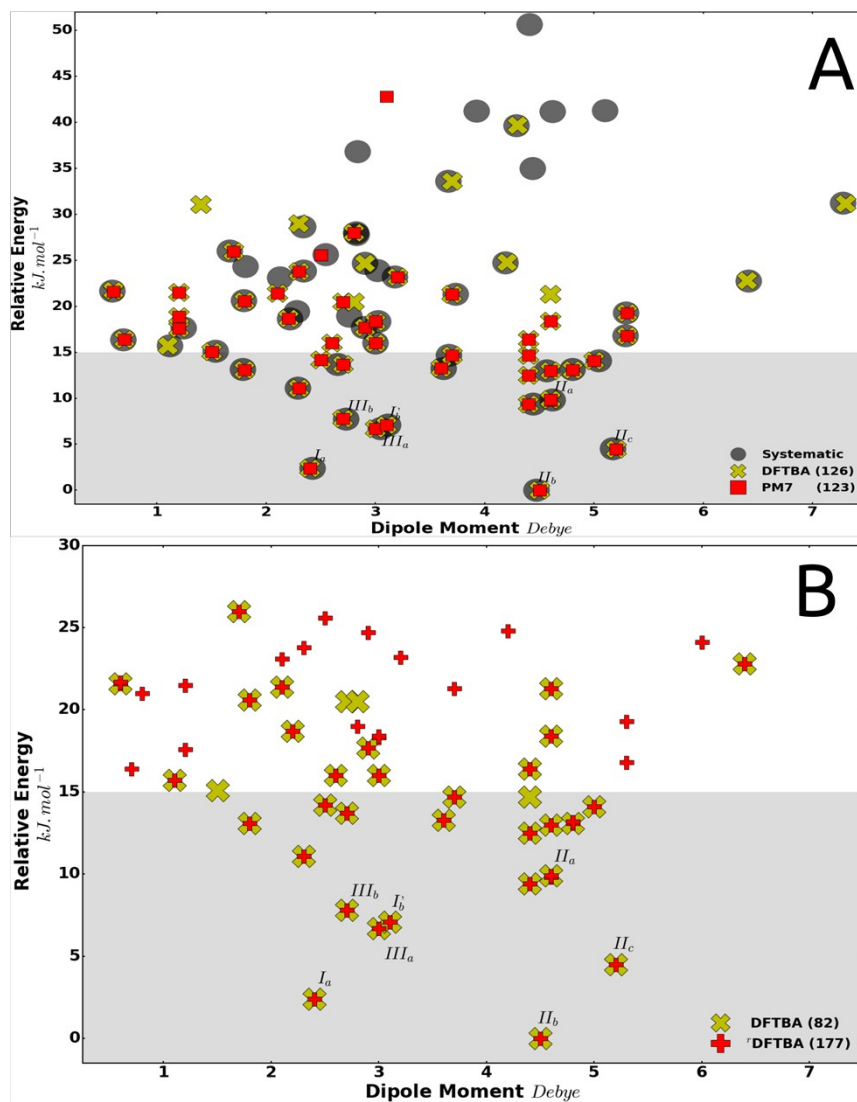

**Figure S1.** (A) Comparison of L-Thr conformers identified by the cheap schemes and previous systematic approach<sup>2</sup>. Shaded portion highlight the low-lying structures within 15 kJ.mol<sup>-1</sup>. The values in parenthesis indicate the total number of DFT optimizations. (B) L-Thr low-lying structures located with DFTBA model through standard and restarts samplings utilizing the worst conformer. Shading highlights low-lying states

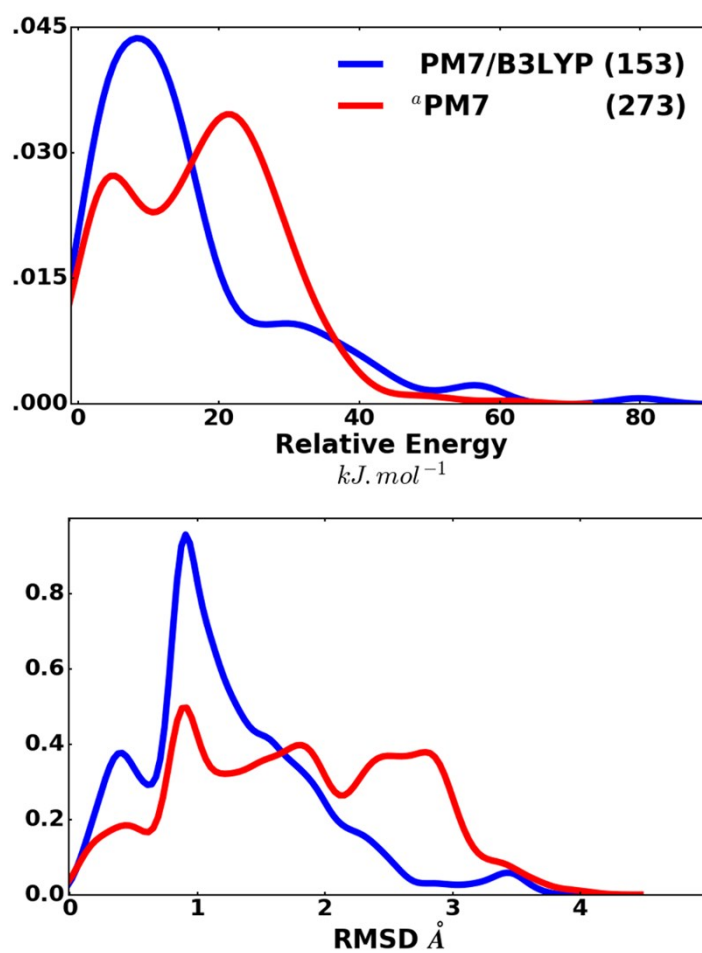

**Figure S2.** Ferrocene derivative conformer search. Distribution of relative energies and heavy atom RMSD of accepted structures. <sup>a</sup>Sampling without single point estimations. Values in parenthesis indicate population size of accepted structures.
